# Supplementary material for: Thromboprophylaxis of elderly patients with AF in the UK: an analysis using the General Practice Research Database (GPRD) 2000–2009
Source: PubMed Central journal article supplement — Heart. 2012 Oct 19;99(2):127–32. doi: 10.1136/heartjnl-2012-302843 (PMC3551210; doi:10.1136/heartjnl-2012-302843), 2012-10-19
Supplement: heartjnl-2012-302843-s1.pdf [file heartjnl-2012-302843-s1.pdf]

## Appendix 1 – GPRD Clinical Codes

### Atrial Fibrillation

| Pegasus Code | Read Code | Read Term                                                    |
|--------------|-----------|--------------------------------------------------------------|
| 1664         | G573000   | Atrial fibrillation                                          |
| 2212         | G573.00   | Atrial fibrillation and flutter                              |
| 1268         | G573200   | Paroxysmal atrial fibrillation                               |
| 18746        | 662S.00   | Atrial fibrillation monitoring                               |
| 6345         | 14AN.00   | H/O: atrial fibrillation                                     |
| 3757         | 3272      | ECG: atrial fibrillation                                     |
| 57832        | 9Os..00   | Atrial fibrillation monitoring administration                |
| 45773        | 6A9..00   | Atrial fibrillation annual review                            |
| 39114        | 9hF1.00   | Excepted from atrial fibrillation qual indic: Inform dissent |
| 23437        | G573z00   | Atrial fibrillation and flutter NOS                          |
| 90187        | 9Os0.00   | Atrial fibrillation monitoring first letter                  |
| 63350        | 9hF..00   | Exception reporting: atrial fibrillation quality indicators  |
| 96076        | G573500   | Persistent atrial fibrillation                               |
| 9479         | 7936A00   | Implant intravenous pacemaker for atrial fibrillation        |
| 90188        | 9Os1.00   | Atrial fibrillation monitoring second letter                 |
| 35127        | G573300   | Non-rheumatic atrial fibrillation                            |
| 90189        | 9Os2.00   | Atrial fibrillation monitoring third letter                  |
| 96277        | G573400   | Permanent atrial fibrillation                                |
| 90190        | 9Os3.00   | Atrial fibrillation monitoring verbal invite                 |
| 90191        | 9Os4.00   | Atrial fibrillation monitoring telephone invite              |

### Stroke

| Pegasus Code | Read Code | Read Term                                                    |
|--------------|-----------|--------------------------------------------------------------|
| 1469         | G66..00   | Stroke and cerebrovascular accident unspecified              |
| 1298         | G66..11   | CVA unspecified                                              |
| 3149         | G64z.00   | Cerebral infarction NOS                                      |
| 5363         | G64..11   | CVA - cerebral artery occlusion                              |
| 6116         | G66..13   | CVA - Cerebrovascular accident unspecified                   |
| 6960         | G61..11   | CVA - cerebrovascular accid due to intracerebral haemorrhage |
| 569          | G64..12   | Infarction - cerebral                                        |
| 7780         | G667.00   | Left sided CVA                                               |
| 12833        | G668.00   | Right sided CVA                                              |
| 6155         | G64..13   | Stroke due to cerebral arterial occlusion                    |
| 6253         | G66..12   | Stroke unspecified                                           |
| 18604        | G61..12   | Stroke due to intracerebral haemorrhage                      |
| 17322        | G664.00   | Cerebellar stroke syndrome                                   |
| 8443         | G663.00   | Brain stem stroke syndrome                                   |
| 9985         | G64z200   | Left sided cerebral infarction                               |
| 10504        | G64z300   | Right sided cerebral infarction                              |
| 36717        | G640000   | Cerebral infarction due to thrombosis of cerebral arteries   |
| 23671        | G63y000   | Cerebral infarct due to thrombosis of precerebral arteries   |
| 6228         | G68X.00   | Sequelae of stroke,not specfd as h'morrhage or infarction    |
| 24446        | G63y100   | Cerebral infarction due to embolism of precerebral arteries  |
| 39344        | G676000   | Cereb infarct due cerebral venous thrombosis, nonpyogenic    |
| 27975        | G641000   | Cerebral infarction due to embolism of cerebral arteries     |
| 53745        | Gyu6400   | [X]Other cerebral infarction                                 |
| 39403        | G683.00   | Sequelae of cerebral infarction                              |
| 47607        | L440.11   | CVA - cerebrovascular accident in the puerperium             |
| 51759        | G677000   | Occlusion and stenosis of middle cerebral artery             |
| 31704        | G677.00   | Occlusion/stenosis cerebral arts not result cerebral infarct |
| 65770        | G677200   | Occlusion and stenosis of posterior cerebral artery          |
| 57527        | G677100   | Occlusion and stenosis of anterior cerebral artery           |
| 56279        | L440.12   | Stroke in the puerperium                                     |

## History of Stroke (Additional to Stroke Codes)

### Pegasus

| Code  | Read Code | Read Term                                                    |
|-------|-----------|--------------------------------------------------------------|
| 10792 | 662M.00   | Stroke monitoring                                            |
| 11039 | 9h21.00   | Excepted from stroke quality indicators: Patient unsuitable  |
| 18686 | 662e.00   | Stroke/CVA annual review                                     |
| 28753 | 9Om0.00   | Stroke/transient ischaemic attack monitoring first letter    |
| 6305  | 14A7.11   | H/O: CVA                                                     |
| 5871  | 14A7.12   | H/O: stroke                                                  |
| 34245 | 9Om1.00   | Stroke/transient ischaemic attack monitoring second letter   |
| 34135 | 14A7.00   | H/O: CVA/stroke                                              |
| 31218 | 9Om..00   | Stroke/transient ischaemic attack monitoring administration  |
| 34375 | 9Om2.00   | Stroke/transient ischaemic attack monitoring third letter    |
| 7138  | ZV12512   | [V]Personal history of cerebrovascular accident (CVA)        |
| 19348 | ZV12511   | [V]Personal history of stroke                                |
| 89913 | 9Om4.00   | Stroke/transient ischaemic attack monitoring telephone invte |
| 28914 | 662o.00   | Haemorrhagic stroke monitoring                               |
| 66873 | 14AK.00   | H/O: Stroke in last year                                     |
| 56458 | 8HHM.00   | Ref to multidisciplinary stroke function improvement service |
| 55351 | 7P24200   | Delivery of rehabilitation for stroke                        |

### TIA

| Pegasus Code | Read Code | Read Term                  |
|--------------|-----------|----------------------------|
| 1433         | G65..12   | Transient ischaemic attack |

### Bleed Codes

#### Intracranial Bleeds

| Pegasus Code | Read Code | Read Term                                                    |
|--------------|-----------|--------------------------------------------------------------|
| 1786         | G60..00   | Subarachnoid haemorrhage                                     |
| 5051         | G61..00   | Intracerebral haemorrhage                                    |
| 6960         | G61..11   | CVA - cerebrovascular accid due to intracerebral haemorrhage |
| 4273         | G621.00   | Subdural haemorrhage - nontraumatic                          |
| 3535         | G61z.00   | Intracerebral haemorrhage NOS                                |
| 18604        | G61..12   | Stroke due to intracerebral haemorrhage                      |
| 18912        | G623.00   | Subdural haemorrhage NOS                                     |
| 13564        | G613.00   | Cerebellar haemorrhage                                       |
| 23580        | G60z.00   | Subarachnoid haemorrhage NOS                                 |
| 30202        | G617.00   | Intracerebral haemorrhage, intraventricular                  |
| 19412        | G602.00   | Subarachnoid haemorrhage from middle cerebral artery         |
| 7912         | G614.00   | Pontine haemorrhage                                          |
| 40338        | G611.00   | Internal capsule haemorrhage                                 |
| 36178        | G620.00   | Extradural haemorrhage - nontraumatic                        |
| 28314        | G61X000   | Left sided intracerebral haemorrhage, unspecified            |
| 19201        | G61X100   | Right sided intracerebral haemorrhage, unspecified           |
| 42331        | G603.00   | Subarachnoid haemorrhage from anterior communicating artery  |
| 43451        | G682.00   | Sequelae of other nontraumatic intracranial haemorrhage      |
| 31805        | G62..00   | Other and unspecified intracranial haemorrhage               |
| 31595        | G610.00   | Cortical haemorrhage                                         |
| 46316        | G612.00   | Basal nucleus haemorrhage                                    |

|       |         |                                                              |
|-------|---------|--------------------------------------------------------------|
| 9696  | G604.00 | Subarachnoid haemorrhage from posterior communicating artery |
| 41910 | G605.00 | Subarachnoid haemorrhage from basilar artery                 |
| 44740 | G680.00 | Sequelae of subarachnoid haemorrhage                         |
| 48149 | G681.00 | Sequelae of intracerebral haemorrhage                        |
| 57315 | G618.00 | Intracerebral haemorrhage, multiple localized                |
| 53810 | Gyu6200 | [X]Other intracerebral haemorrhage                           |
| 65745 | Gyu6100 | [X]Other subarachnoid haemorrhage                            |
| 60692 | G606.00 | Subarachnoid haemorrhage from vertebral artery               |
| 63806 | Q200y00 | Subdural or cerebral haemorrhage due to birth trauma OS      |
| 56007 | G601.00 | Subarachnoid haemorrhage from carotid siphon and bifurcation |
| 96630 | Gyu6F00 | [X]Intracerebral haemorrhage in hemisphere, unspecified      |
| 2883  | S622.00 | Closed traumatic subdural haemorrhage                        |
| 5682  | S62..00 | Cerebral haemorrhage following injury                        |
| 20284 | G62z.00 | Intracranial haemorrhage NOS                                 |
| 27661 | S62..11 | Extradural haemorrhage following injury                      |
| 31060 | G61X.00 | Intracerebral haemorrhage in hemisphere, unspecified         |
| 8181  | S628.00 | Traumatic subdural haemorrhage                               |
| 46545 | S62z.00 | Cerebral haemorrhage following injury NOS                    |
| 38304 | S620.00 | Closed traumatic subarachnoid haemorrhage                    |
| 45421 | S624.00 | Closed traumatic extradural haemorrhage                      |
| 28077 | S62..14 | Traumatic cerebral haemorrhage                               |
| 58545 | S627.00 | Traumatic subarachnoid haemorrhage                           |
| 30045 | G616.00 | External capsule haemorrhage                                 |
| 62342 | G615.00 | Bulbar haemorrhage                                           |
| 73471 | S625.00 | Open traumatic extradural haemorrhage                        |
| 94351 | S623.00 | Open traumatic subdural haemorrhage                          |
| 96717 | S621.00 | Open traumatic subarachnoid haemorrhage                      |
| 6569  | S62..13 | Subdural haemorrhage following injury                        |

## GI Bleeds

| Pegasus Code | Read Code | Read Term                                             |
|--------------|-----------|-------------------------------------------------------|
| 1642         | J68z.11   | GIB - Gastrointestinal bleeding                       |
| 3097         | J68..00   | Gastrointestinal haemorrhage                          |
| 4354         | J68z200   | Upper gastrointestinal haemorrhage                    |
| 2814         | J12y100   | Unspecified duodenal ulcer with haemorrhage           |
| 4636         | J68zz00   | Gastrointestinal tract haemorrhage NOS                |
| 15517        | J68z000   | Gastric haemorrhage NOS                               |
| 18001        | J120100   | Acute duodenal ulcer with haemorrhage                 |
| 2150         | J68z100   | Intestinal haemorrhage NOS                            |
| 12471        | J68z.00   | Gastrointestinal haemorrhage unspecified              |
| 11124        | J110111   | Bleeding acute gastric ulcer                          |
| 30054        | J110100   | Acute gastric ulcer with haemorrhage                  |
| 48951        | J121100   | Chronic duodenal ulcer with haemorrhage               |
| 44637        | J130100   | Acute peptic ulcer with haemorrhage                   |
| 63582        | J111100   | Chronic gastric ulcer with haemorrhage                |
| 36583        | J111111   | Bleeding chronic gastric ulcer                        |
| 48730        | J120300   | Acute duodenal ulcer with haemorrhage and perforation |
| 57958        | J11y100   | Unspecified gastric ulcer with haemorrhage            |

|       |         |                                                              |
|-------|---------|--------------------------------------------------------------|
| 53126 | J131100 | Chronic peptic ulcer with haemorrhage                        |
| 94397 | J11yy00 | Unspec gastric ulcer; unspec haemorrhage and/or perforation  |
| 70456 | J13y100 | Unspecified peptic ulcer with haemorrhage                    |
| 71403 | J110300 | Acute gastric ulcer with haemorrhage and perforation         |
| 71897 | J111300 | Chronic gastric ulcer with haemorrhage and perforation       |
| 28366 | J12yy00 | Unspec duodenal ulcer; unspec haemorrhage and/or perforation |
| 71881 | J121300 | Chronic duodenal ulcer with haemorrhage and perforation      |
| 45304 | J130300 | Acute peptic ulcer with haemorrhage and perforation          |
| 60346 | J14y100 | Unspecified gastrojejunal ulcer with haemorrhage             |
| 93436 | J12y300 | Unspecified duodenal ulcer with haemorrhage and perforation  |
| 96622 | J13y300 | Unspecified peptic ulcer with haemorrhage and perforation    |
| 96628 | J140100 | Acute gastrojejunal ulcer with haemorrhage                   |

### Coronary Heart Disease

| Pegasus Code | Read Code | Read Term                                                   |
|--------------|-----------|-------------------------------------------------------------|
| 241          | G30..00   | Acute myocardial infarction                                 |
| 14658        | G30z.00   | Acute myocardial infarction NOS                             |
| 1677         | G30..15   | MI - acute myocardial infarction                            |
| 10562        | G307100   | Acute non-ST segment elevation myocardial infarction        |
| 5904         | 792..00   | Coronary artery operations                                  |
| 1678         | G308.00   | Inferior myocardial infarction NOS                          |
| 1204         | G30..14   | Heart attack                                                |
| 12229        | G30X000   | Acute ST segment elevation myocardial infarction            |
| 2491         | G30..12   | Coronary thrombosis                                         |
| 14897        | G301z00   | Anterior myocardial infarction NOS                          |
| 7442         | 7920200   | Saphenous vein graft replacement of three coronary arteries |
| 5387         | G301.00   | Other specified anterior myocardial infarction              |
| 12139        | G300.00   | Acute anterolateral infarction                              |
| 8935         | G302.00   | Acute inferolateral infarction                              |
| 11610        | 7920300   | Saphenous vein graft replacement of four+ coronary arteries |
| 17872        | G301100   | Acute anteroseptal infarction                               |
| 7634         | 7920100   | Saphenous vein graft replacement of two coronary arteries   |
| 9507         | G307000   | Acute non-Q wave infarction                                 |
| 10603        | 792z.00   | Coronary artery operations NOS                              |
| 23892        | G304.00   | Posterior myocardial infarction NOS                         |
| 7783         | 323..00   | ECG: myocardial infarction                                  |
| 16408        | G32..11   | Healed myocardial infarction                                |
| 14898        | G305.00   | Lateral myocardial infarction NOS                           |
| 13571        | G30..16   | Thrombosis - coronary                                       |
| 29643        | G303.00   | Acute inferoposterior infarction                            |
| 17689        | G30..17   | Silent myocardial infarction                                |
| 46017        | G30yz00   | Other acute myocardial infarction NOS                       |
| 18842        | G35..00   | Subsequent myocardial infarction                            |
| 13566        | G30..11   | Attack - heart                                              |
| 47788        | 7927      | Other open operations on coronary artery                    |
| 32272        | G38..00   | Postoperative myocardial infarction                         |
| 9555         | G33z500   | Post infarct angina                                         |
| 34803        | G30y.00   | Other acute myocardial infarction                           |
| 29758        | G30X.00   | Acute transmural myocardial infarction of unspecif site     |
| 41221        | G30y200   | Acute septal infarction                                     |
| 10209        | 7921200   | Autograft replacement of three coronary arteries NEC        |
| 23579        | G310.00   | Postmyocardial infarction syndrome                          |
| 42708        | 7921300   | Autograft replacement of four of more coronary arteries NEC |
| 19413        | 7921100   | Autograft replacement of two coronary arteries NEC          |

|       |         |                                                              |
|-------|---------|--------------------------------------------------------------|
| 38609 | G351.00 | Subsequent myocardial infarction of inferior wall            |
| 63467 | G306.00 | True posterior myocardial infarction                         |
| 32854 | G30B.00 | Acute posterolateral myocardial infarction                   |
| 41835 | G384.00 | Postoperative subendocardial myocardial infarction           |
| 45370 | 7922300 | Allograft replacement of four or more coronary arteries      |
| 45886 | 7922200 | Allograft replacement of three coronary arteries             |
| 31540 | 7924200 | Revision of bypass for three coronary arteries               |
| 26972 | 3234    | ECG:posterior/inferior infarct                               |
| 67761 | 7923300 | Prosthetic replacement of four or more coronary arteries     |
| 46276 | G381.00 | Postoperative transmural myocardial infarction inferior wall |
| 55092 | 792C000 | Replacement of coronary arteries using multiple methods      |
| 66236 | 7923200 | Prosthetic replacement of three coronary arteries            |
| 57241 | 7922100 | Allograft replacement of two coronary arteries               |
| 67554 | 7924100 | Revision of bypass for two coronary arteries                 |
| 68748 | G38z.00 | Postoperative myocardial infarction, unspecified             |
| 31519 | 7925100 | Double implant of mammary arteries into coronary arteries    |
| 46112 | G380.00 | Postoperative transmural myocardial infarction anterior wall |
| 46166 | G35X.00 | Subsequent myocardial infarction of unspecified site         |
| 62608 | 7926000 | Double anastom thoracic arteries to coronary arteries NEC    |
| 62626 | G30y100 | Acute papillary muscle infarction                            |
| 66664 | 7923100 | Prosthetic replacement of two coronary arteries              |
| 72562 | G353.00 | Subsequent myocardial infarction of other sites              |
| 96838 | Gyu3400 | [X]Acute transmural myocardial infarction of unspecif site   |
| 1430  | G33..00 | Angina pectoris                                              |
| 19542 | 662K000 | Angina control - good                                        |
| 1431  | G311.13 | Unstable angina                                              |
| 13185 | 662K.00 | Angina control                                               |
| 1344  | G340.12 | Coronary artery disease                                      |
| 7347  | G311100 | Unstable angina                                              |
| 8942  | 7929400 | Insertion of coronary artery stent                           |
| 28554 | G33zz00 | Angina pectoris NOS                                          |
| 7137  | 7920y00 | Saphenous vein graft replacement of coronary artery OS       |
| 1414  | G33z300 | Angina on effort                                             |
| 4656  | G311.11 | Crescendo angina                                             |
| 12804 | G33z700 | Stable angina                                                |
| 25842 | G33z.00 | Angina pectoris NOS                                          |
| 15373 | 662K100 | Angina control - poor                                        |
| 18118 | G311400 | Worsening angina                                             |
| 17054 | 7N41300 | [SO]Coronary artery                                          |
| 18249 | 7920    | Saphenous vein graft replacement of coronary artery          |
| 14782 | 662K200 | Angina control - improving                                   |
| 15349 | 662Kz00 | Angina control NOS                                           |
| 17307 | G311200 | Angina at rest                                               |
| 18889 | G34z000 | Asymptomatic coronary heart disease                          |
| 19655 | G311.14 | Angina at rest                                               |
| 36854 | G332.00 | Coronary artery spasm                                        |
| 12986 | G331.00 | Prinzmetal's angina                                          |
| 22020 | 792B000 | Endarterectomy of coronary artery NEC                        |
| 42304 | 7929500 | Insertion of drug-eluting coronary artery stent              |
| 8679  | 7920000 | Saphenous vein graft replacement of one coronary artery      |
| 17133 | G30A.00 | Mural thrombosis                                             |
| 51515 | 7920z00 | Saphenous vein graft replacement coronary artery NOS         |
| 9414  | 7921    | Other autograft replacement of coronary artery               |
| 24888 | 7929    | Other therapeutic transluminal operations on coronary artery |

|       |         |                                                              |
|-------|---------|--------------------------------------------------------------|
| 18125 | G330000 | Nocturnal angina                                             |
| 26863 | G33z600 | New onset angina                                             |
| 11048 | G331.11 | Variant angina pectoris                                      |
| 30421 | G30..13 | Cardiac rupture following myocardial infarction (MI)         |
| 34328 | G311300 | Refractory angina                                            |
| 31571 | 792y.00 | Other specified operations on coronary artery                |
| 45960 | 8B27.00 | Antianginal therapy                                          |
| 34965 | 792A.00 | Diagnostic transluminal operations on coronary artery        |
| 28736 | G30y000 | Acute atrial infarction                                      |
| 40429 | G301000 | Acute anteroapical infarction                                |
| 39449 | G312.00 | Coronary thrombosis not resulting in myocardial infarction   |
| 44561 | 7921000 | Autograft replacement of one coronary artery NEC             |
| 44585 | 792Bz00 | Repair of coronary artery NOS                                |
| 31556 | 7922    | Allograft replacement of coronary artery                     |
| 45809 | G350.00 | Subsequent myocardial infarction of anterior wall            |
| 55137 | G311011 | MI - myocardial infarction aborted                           |
| 33620 | 792B.00 | Repair of coronary artery NEC                                |
| 61072 | G311000 | Myocardial infarction aborted                                |
| 51043 | ZRBN.00 | Duke's coronary artery disease score                         |
| 6182  | 7929y00 | Other therapeutic transluminal op on coronary artery OS      |
| 29902 | G330z00 | Angina decubitus NOS                                         |
| 19402 | 7923    | Prosthetic replacement of coronary artery                    |
| 51702 | 7927400 | Exploration of coronary artery                               |
| 51507 | 7925300 | Single anastomosis of mammary artery to coronary artery NEC  |
| 33718 | 7925000 | Double anastomosis of mammary arteries to coronary arteries  |
| 55598 | 792C.00 | Other replacement of coronary artery                         |
| 41757 | 7927z00 | Other open operation on coronary artery NOS                  |
| 7609  | 7921z00 | Other autograft replacement of coronary artery NOS           |
| 37719 | 7925y00 | Connection of mammary artery to coronary artery OS           |
| 48767 | 7922z00 | Allograft replacement of coronary artery NOS                 |
| 61248 | 792Az00 | Diagnostic transluminal operation on coronary artery NOS     |
| 66583 | 7929200 | Percut translum inject therap subst to coronary artery NEC   |
| 93618 | 7929600 | Percutaneous transluminal atherectomy of coronary artery     |
| 56905 | 792Ay00 | Diagnostic transluminal operation on coronary artery OS      |
| 68139 | 7925400 | Single implantation of mammary artery into coronary artery   |
| 61310 | 7921y00 | Other autograft replacement of coronary artery OS            |
| 69247 | 792By00 | Other specified repair of coronary artery                    |
| 70755 | 792Cz00 | Replacement of coronary artery NOS                           |
| 52615 | P6y7.00 | Myocardial bridge of coronary artery                         |
| 59423 | 7922y00 | Other specified allograft replacement of coronary artery     |
| 60753 | 7926300 | Single implantation thoracic artery into coronary artery NEC |
| 67591 | 7926200 | Single anastomosis of thoracic artery to coronary artery NEC |
| 70111 | 7922000 | Allograft replacement of one coronary artery                 |
| 19193 | 7923z00 | Prosthetic replacement of coronary artery NOS                |
| 39546 | Gyu3000 | [X]Other forms of angina pectoris                            |
| 61592 | 7927200 | Transection of muscle bridge of coronary artery              |
| 72780 | 7926z00 | Connection of other thoracic artery to coronary artery NOS   |
| 92419 | 7923000 | Prosthetic replacement of one coronary artery                |
| 93828 | 792Cy00 | Other specified replacement of coronary artery               |
| 94783 | 792B100 | Repair of rupture of coronary artery                         |
| 95382 | 7927y00 | Other specified other open operation on coronary artery      |
| 96804 | 7926    | Connection of other thoracic artery to coronary artery       |

## Hypertension

| <b>Pegasus Code</b> | <b>Read Code</b> | <b>Read Term</b>                                      |
|---------------------|------------------|-------------------------------------------------------|
| 799                 | G20..00          | Essential hypertension                                |
| 4444                | 662..12          | Hypertension monitoring                               |
| 204                 | G2...00          | Hypertensive disease                                  |
| 13186               | 662P.00          | Hypertension monitoring                               |
| 351                 | G20..11          | High blood pressure                                   |
| 10818               | G20z.00          | Essential hypertension NOS                            |
| 19070               | 662d.00          | Hypertension annual review                            |
| 3712                | G20z.11          | Hypertension NOS                                      |
| 18482               | 662c.00          | Hypertension six month review                         |
| 11056               | 8BL0.00          | Patient on maximal tolerated antihypertensive therapy |
| 3425                | 662O.00          | On treatment for hypertension                         |
| 16565               | 6627             | Good hypertension control                             |
| 7057                | G2z..00          | Hypertensive disease NOS                              |
| 27511               | 6628             | Poor hypertension control                             |
| 13188               | 662G.00          | Hypertensive treatm.changed                           |
| 1894                | G201.00          | Benign essential hypertension                         |
| 8732                | G2...11          | BP - hypertensive disease                             |
| 4372                | G202.00          | Systolic hypertension                                 |
| 27634               | 9N1y200          | Seen in hypertension clinic                           |
| 18057               | 8B26.00          | Antihypertensive therapy                              |
| 21826               | 662F.00          | Hypertension treatm. started                          |
| 24127               | 9OIA.11          | Hypertension monitored                                |
| 6702                | F421300          | Hypertensive retinopathy                              |
| 16292               | G21..00          | Hypertensive heart disease                            |
| 15377               | G200.00          | Malignant essential hypertension                      |
| 18590               | 662b.00          | Moderate hypertension control                         |
| 22356               | 1JD..00          | Suspected hypertension                                |
| 7329                | G24..00          | Secondary hypertension                                |
| 12680               | 8CR4.00          | Hypertension clinical management plan                 |
| 4668                | G22..00          | Hypertensive renal disease                            |
| 8857                | G21z011          | Cardiomegaly - hypertensive                           |
| 30776               | 6629             | Hypertension:follow-up default                        |
| 29310               | G22z.11          | Renal hypertension                                    |
| 16059               | G24z.00          | Secondary hypertension NOS                            |
| 18765               | G2y..00          | Other specified hypertensive disease                  |
| 16173               | G21zz00          | Hypertensive heart disease NOS                        |
| 3979                | G672.00          | Hypertensive encephalopathy                           |
| 21660               | TJC7.00          | Adverse reaction to other antihypertensives           |
| 31341               | G24z100          | Hypertension secondary to drug                        |
| 20497               | TJC7z00          | Adverse reaction to antihypertensives NOS             |
| 22333               | 8I3N.00          | Hypertension treatment refused                        |
| 32976               | 6146200          | Hypertension induced by oral contraceptive pill       |
| 15106               | G22z.00          | Hypertensive renal disease NOS                        |
| 83473               | G203.00          | Diastolic hypertension                                |
| 31387               | G24z000          | Secondary renovascular hypertension NOS               |
| 42229               | G24zz00          | Secondary hypertension NOS                            |
| 39649               | G220.00          | Malignant hypertensive renal disease                  |
| 31816               | G672.11          | Hypertensive crisis                                   |
| 34744               | G244.00          | Hypertension secondary to endocrine disorders         |
| 25371               | G241000          | Secondary benign renovascular hypertension            |
| 31464               | G21z.00          | Hypertensive heart disease NOS                        |
| 32423               | G222.00          | Hypertensive renal disease with renal failure         |

|       |         |                                                             |
|-------|---------|-------------------------------------------------------------|
| 57288 | G241.00 | Secondary benign hypertension                               |
| 28684 | G233.00 | Hypertensive heart and renal disease with renal failure     |
| 51635 | G241z00 | Secondary benign hypertension NOS                           |
| 31755 | G240.00 | Secondary malignant hypertension                            |
| 37086 | F404200 | Blind hypertensive eye                                      |
| 30770 | U60C511 | [X] Adverse reaction to other antihypertensives             |
| 21837 | G232.00 | Hypertensive heart&renal dis wth (congestive) heart failure |
| 43935 | G221.00 | Benign hypertensive renal disease                           |
| 69753 | Gyu2.00 | [X]Hypertensive diseases                                    |
| 52427 | G211.00 | Benign hypertensive heart disease                           |
| 61166 | G21z000 | Hypertensive heart disease NOS without CCF                  |
| 63466 | G23..00 | Hypertensive heart and renal disease                        |
| 62718 | G21z100 | Hypertensive heart disease NOS with CCF                     |
| 50157 | G210.00 | Malignant hypertensive heart disease                        |
| 44350 | U60C51A | [X] Adverse reaction to antihypertensives NOS               |
| 52127 | G211100 | Benign hypertensive heart disease with CCF                  |
| 59383 | G240000 | Secondary malignant renovascular hypertension               |
| 68659 | G23z.00 | Hypertensive heart and renal disease NOS                    |
| 61660 | G211000 | Benign hypertensive heart disease without CCF               |
| 73293 | G240z00 | Secondary malignant hypertension NOS                        |
| 67232 | G230.00 | Malignant hypertensive heart and renal disease              |
| 85944 | 7Q01.00 | High cost hypertension drugs                                |
| 63000 | G231.00 | Benign hypertensive heart and renal disease                 |
| 63260 | SLC6z00 | Hypertensive agent poisoning NOS                            |
| 95334 | G210000 | Malignant hypertensive heart disease without CCF            |
| 72226 | SLC6.00 | Other hypertensive agent poisoning                          |
| 72668 | G210100 | Malignant hypertensive heart disease with CCF               |
| 97533 | Gyu2100 | [X]Hypertension secondary to other renal disorders          |



## Appendix 2

### Warfarin Codes

| Product Code | Product Name                                | Drug substance  |
|--------------|---------------------------------------------|-----------------|
| 45           | warfarin sodium tablets 1mg                 | warfarin sodium |
| 61           | warfarin sodium tablets 3mg                 | warfarin sodium |
| 1781         | warfarin sodium tablets 5mg                 | warfarin sodium |
| 6262         | warfarin sodium tablets 500 micrograms      | warfarin sodium |
| 8466         | MAREVAN tablets 1mg [GOLDSHIELD]            | warfarin sodium |
| 8467         | MAREVAN tablets 3mg [GOLDSHIELD]            | warfarin sodium |
| 13348        | MAREVAN tablets 5mg [GOLDSHIELD]            | warfarin sodium |
| 23078        | WARFARIN tablets 1mg [WB]                   | warfarin sodium |
| 31511        | WARFARIN tablets 3mg [WB]                   | warfarin sodium |
| 17965        | MAREVAN tablets 500 micrograms [GOLDSHIELD] | warfarin sodium |
| 33711        | WARFARIN tablets 5mg [WB]                   | warfarin sodium |
| 31937        | WARFARIN tablets 5mg [TEVA]                 | warfarin sodium |
| 34019        | WARFARIN tablets 1mg [IVAX]                 | warfarin sodium |
| 34758        | WARFARIN tablets 3mg [IVAX]                 | warfarin sodium |
| 34864        | WARFARIN tablets 5mg [IVAX]                 | warfarin sodium |
| 34299        | WARFARIN tablets 1mg [TEVA]                 | warfarin sodium |
| 30202        | WARFARIN WBP tablets 1mg [BOEH I HSP]       | warfarin sodium |
| 43408        | WARFARIN tablets 1mg [HILLCROSS]            | warfarin sodium |
| 30203        | WARFARIN WBP tablets 3mg [BOEH I HSP]       | warfarin sodium |
| 34087        | WARFARIN tablets 1mg [CELLTECH]             | warfarin sodium |
| 43407        | WARFARIN tablets 3mg [HILLCROSS]            | warfarin sodium |
| 34417        | WARFARIN tablets 3mg [TEVA]                 | warfarin sodium |
| 34095        | WARFARIN WBP tablets 5mg [BOEH I HSP]       | warfarin sodium |
| 43409        | WARFARIN tablets 5mg [HILLCROSS]            | warfarin sodium |
| 34086        | WARFARIN tablets 3mg [CELLTECH]             | warfarin sodium |
| 833          | warfarin sodium oral liquid 3mg/5ml         | warfarin sodium |
| 36099        | warfarin sodium oral suspension 1mg/5ml     | warfarin sodium |
| 40143        | WARFARIN tablets 500 micrograms [HILLCROSS] | warfarin sodium |
| 34088        | WARFARIN tablets 5mg [CELLTECH]             | warfarin sodium |
| 34526        | WARFARIN tablets 3mg [GEN (UK)]             | warfarin sodium |
| 34418        | WARFARIN tablets 5mg [GEN (UK)]             | warfarin sodium |
| 34517        | WARFARIN tablets 1mg [GEN (UK)]             | warfarin sodium |
| 34416        | WARFARIN tablets 1mg [KENT]                 | warfarin sodium |
| 38041        | warfarin sodium oral suspension 5mg/5ml     | warfarin sodium |
| 34576        | WARFARIN tablets 1mg [LAGAP]                | warfarin sodium |
| 38044        | warfarin sodium oral solution 5mg/5ml       | warfarin sodium |
| 10560        | WARFARIN 10 MG TAB                          |                 |
| 39866        | WARFARIN tablets 1mg [ALMUS]                | warfarin sodium |
| 34918        | WARFARIN tablets 5mg [ACTAVIS]              | warfarin sodium |
| 34691        | WARFARIN tablets 5mg [REGENT]               | warfarin sodium |
| 20754        | WARFARIN                                    |                 |
| 43655        | warfarin sodium oral liquid                 | warfarin sodium |
